# Supplementary material for: Seasonal effects in the application of the MOment MAtching (MOMA) remote calibration tool to outdoor PM 2.5 air sensors
Source: Copernicus journal article supplement (doi:10.5194/amt-18-3635-2025), 2025-08-07
Supplement: Supplementary file 1 [file amt-18-3635-2025-supplement.pdf]

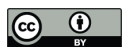

*Supplement of*

## **Seasonal effects in the application of the MOment MAtching (MOMA) remote calibration tool to outdoor PM<sub>2.5</sub> air sensors**

**Lena Francesca Weissert et al.**

*Correspondence to:* Lena Francesca Weissert ([lana.weissert@aeroqual.com](mailto:lana.weissert@aeroqual.com))

The copyright of individual parts of the supplement might differ from the article licence.

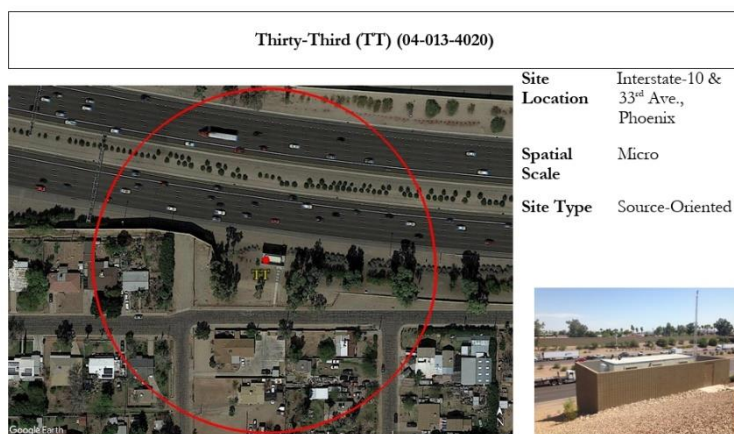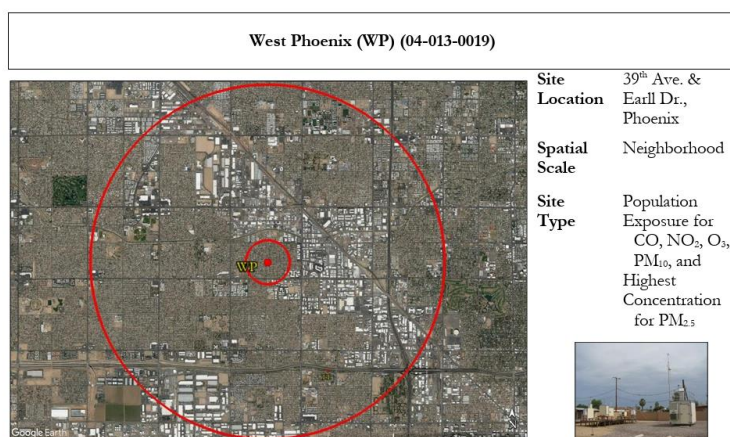

**Figure S1. Aerial photo and site photo for site 33<sup>rd</sup> (top) and West Phoenix (bottom). Source: <https://www.maricopa.gov/DocumentCenter/View/47347/Final-Air-Monitoring-Network-Plan-2018-PDF> (last access: 24 July 2025).**

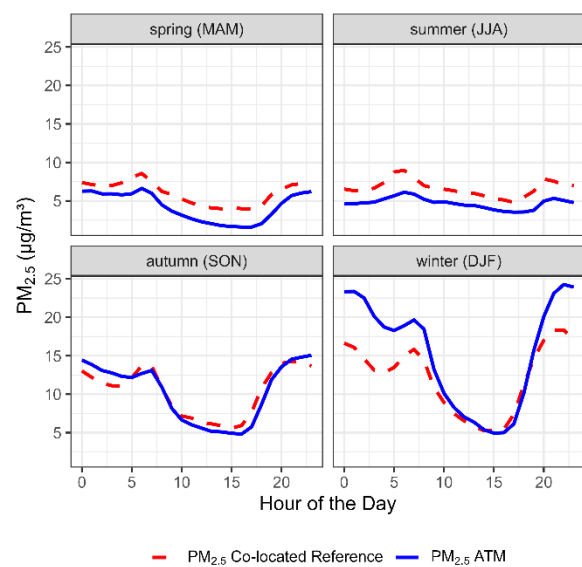

**Figure S2. Hourly averaged uncorrected ( $PM_{2.5}$  ATM) PurpleAir data measured at the 4 co-location sites compared to the hourly averaged co-located reference data for each season.**
